# Supplementary material for: Montreal Protocol's impact on the ozone layer and climate
Source: Copernicus journal article supplement (doi:10.5194/acp-2022-730), 2022-11-10
Supplement: Supplementary file [file acp-2022-730-AC2-supplement.pdf]

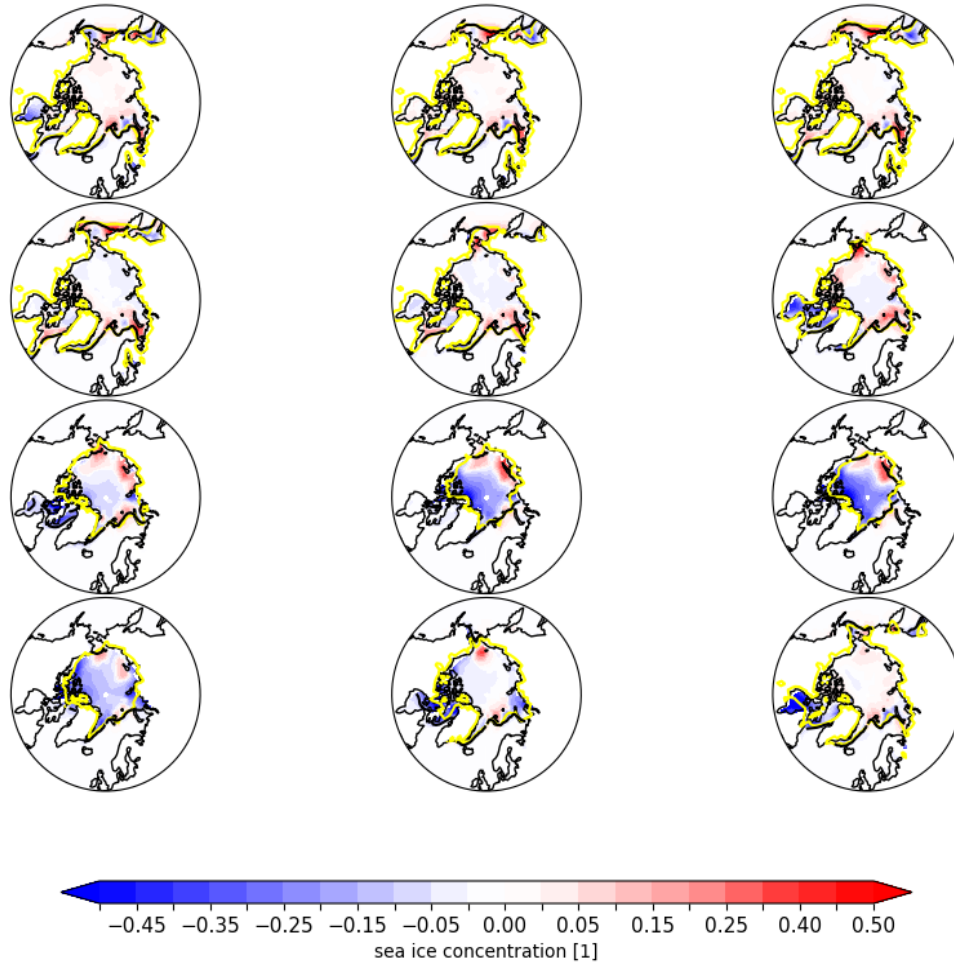

*Caption: Sea ice cover between 1990 and 2015. The colors indicate the concentration. The yellow line is the ERA-5 sea ice edge and the black line is the simulation sea ice edge.*

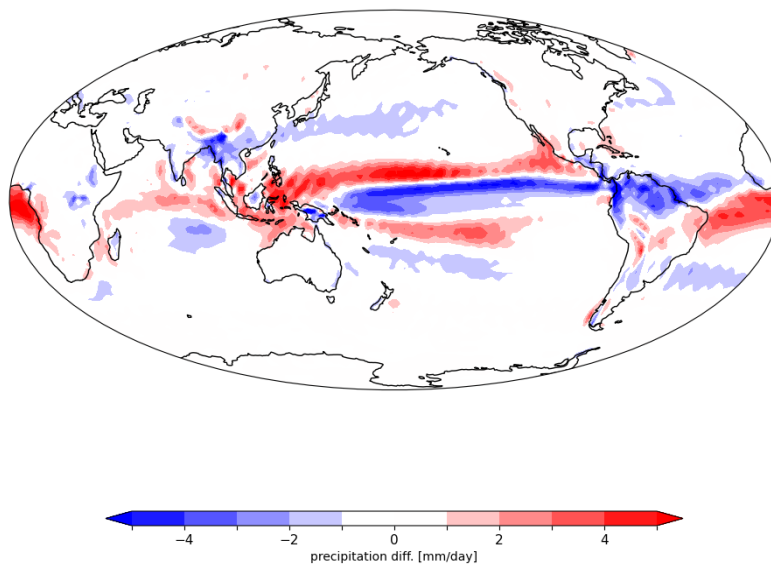

*Caption: Annually averaged mean precipitation. SOCOLv4 minus ERA-5 precipitation.*
